# Supplementary material
Source: PubMed Central journal article supplement (PMC5770980)

Supplemental Figure 1. Pedigrees of (a) North American and (b) Turkish MRKH patients are shown. Arrows indicated MRKH probands. The key is shown:

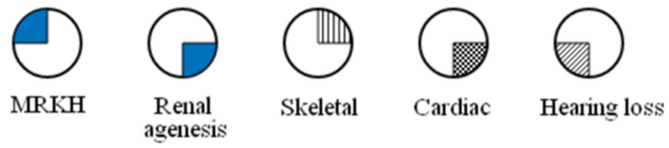

# North American/European Patients

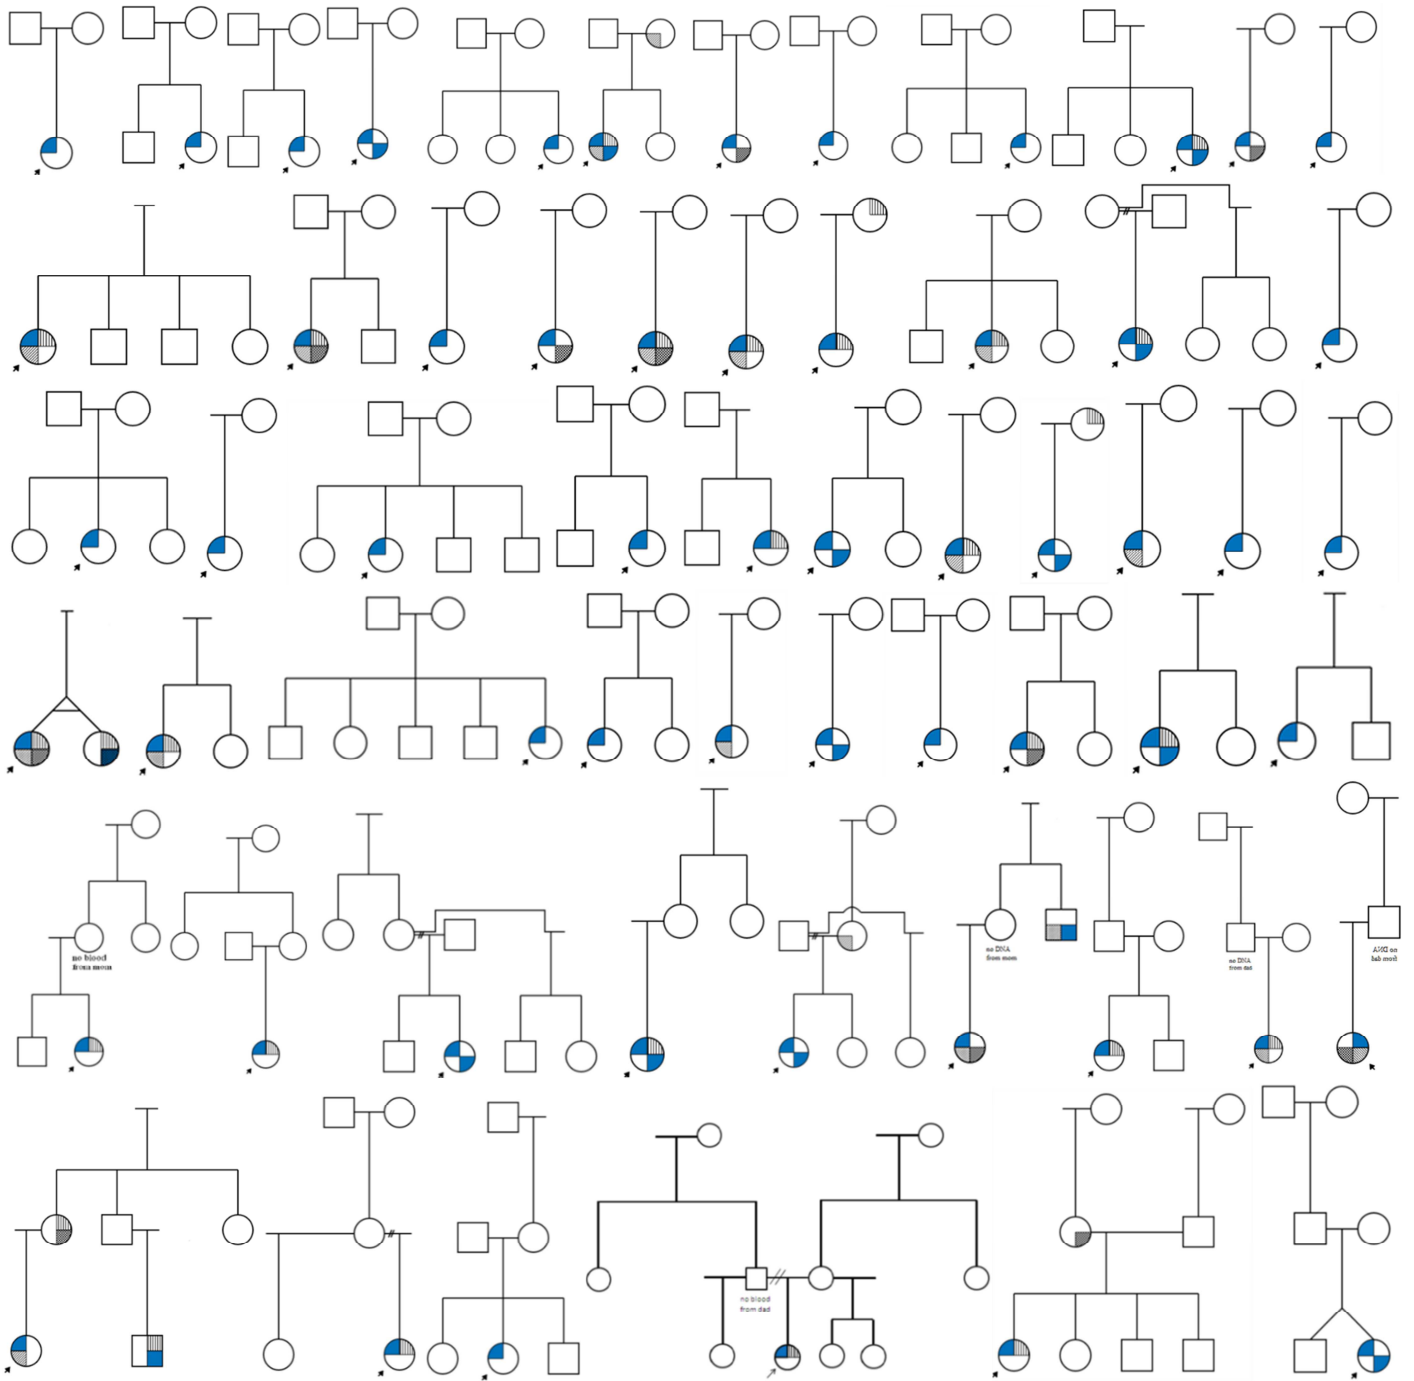

# Turkish Patients

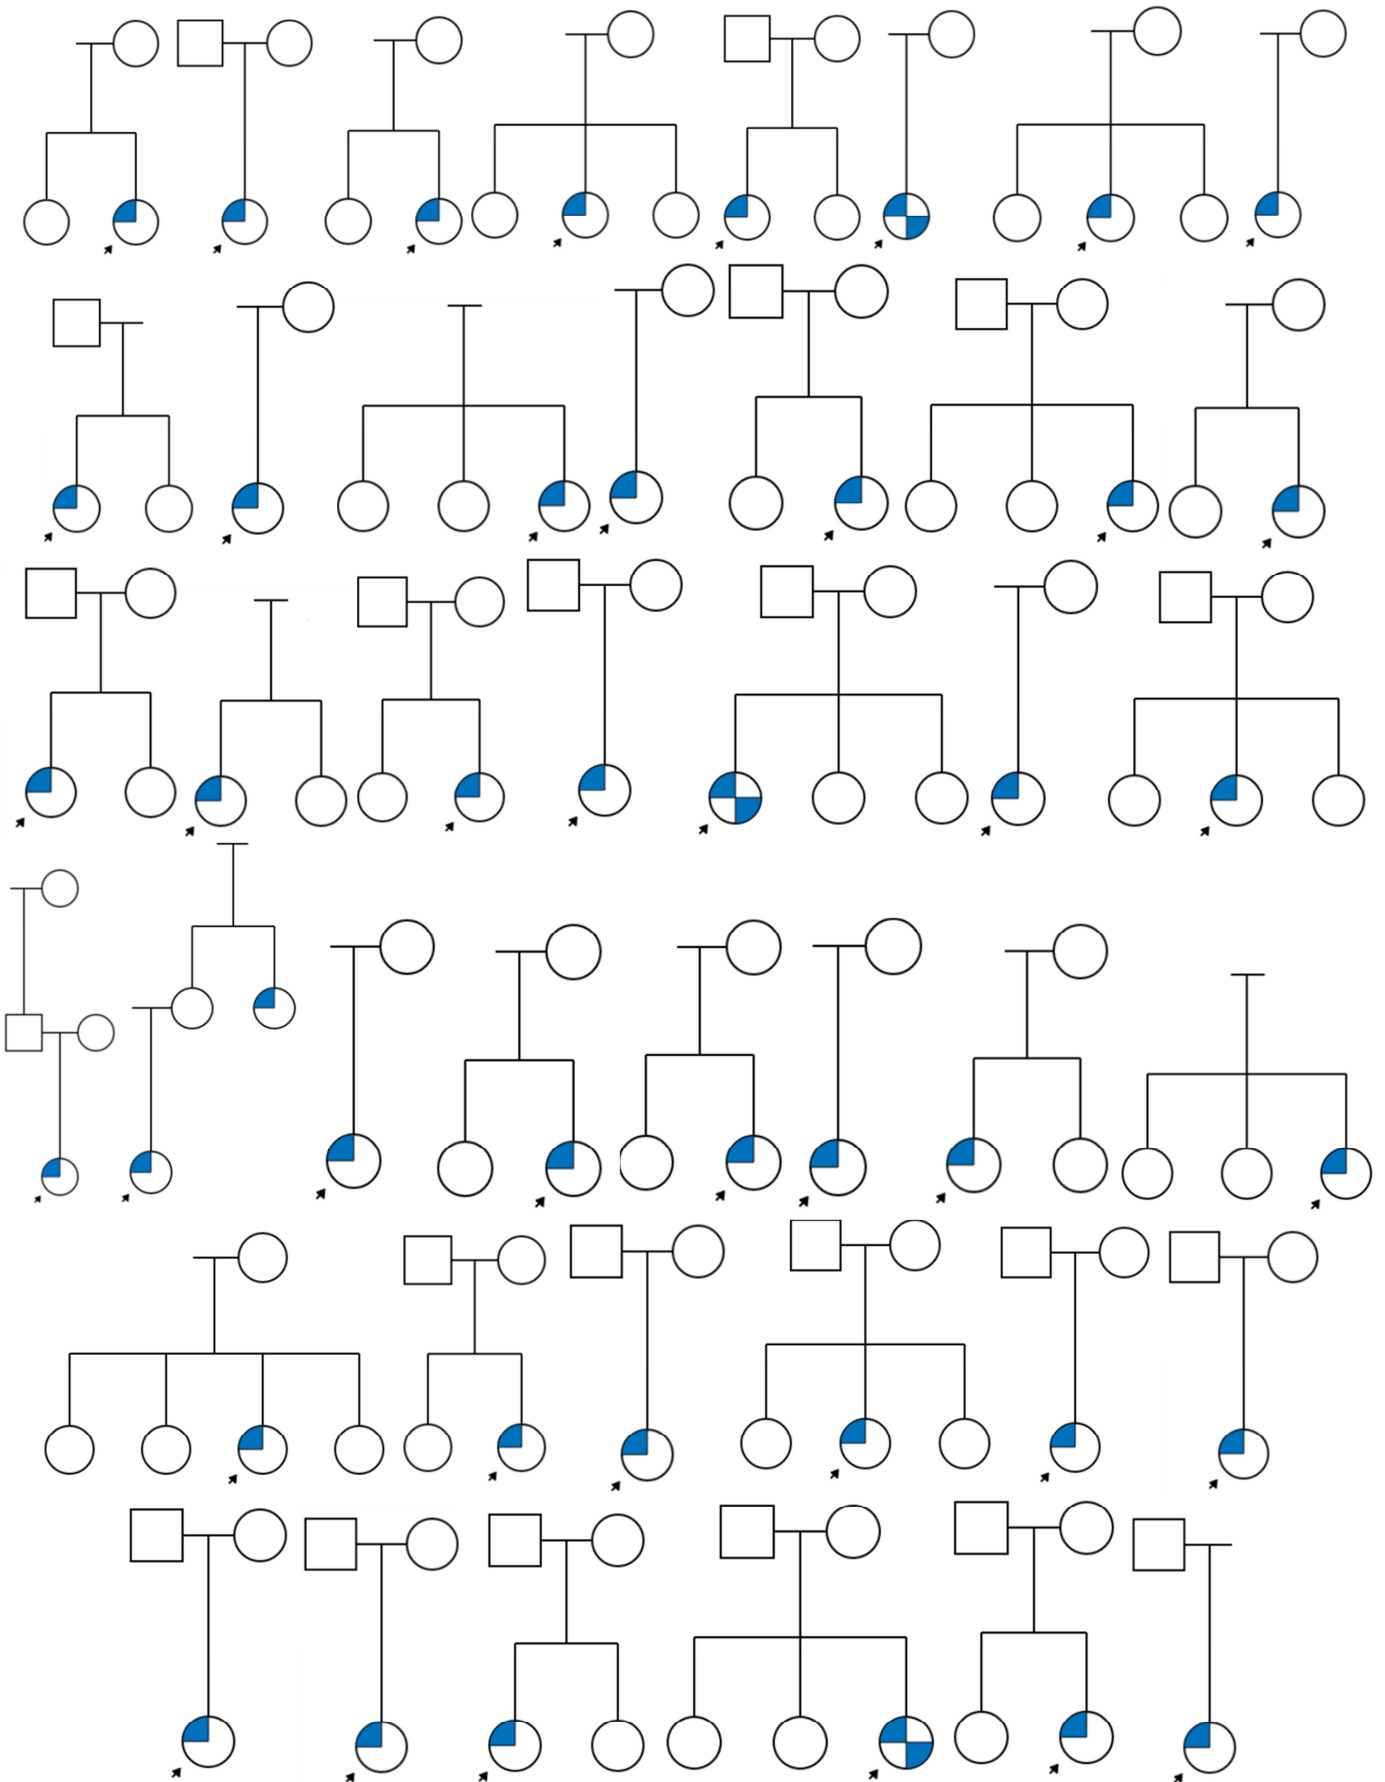

Supplement: NIHMS882904-supplement-supplement_1.pdf [file NIHMS882904-supplement-supplement_1.pdf]
